# Supplementary material
Source: Research Square preprint supplement (doi:10.21203/rs.3.rs-8605629/v1)
Supplement: Supplementary file 1 [file 7043a5d6d4ede2846d15035a.docx]

Supplementary Materials

Supplementary Table 1
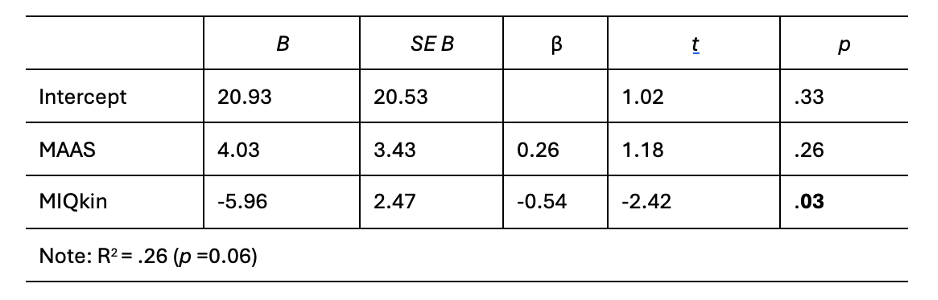
. *% Success linear regression output for control group.*

Supplementary Table 2. *MRE linear regression output for control group.*


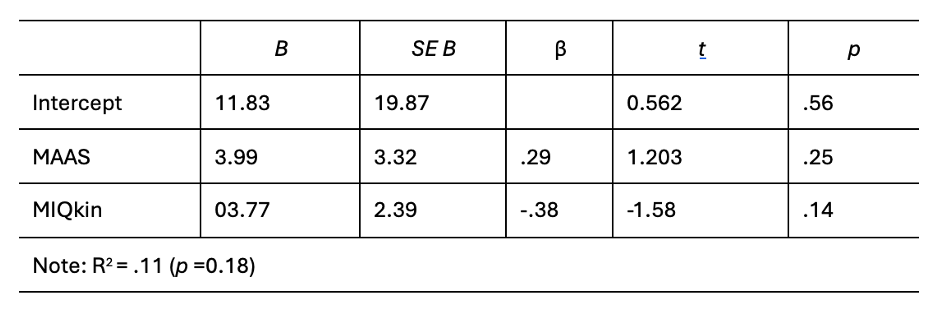


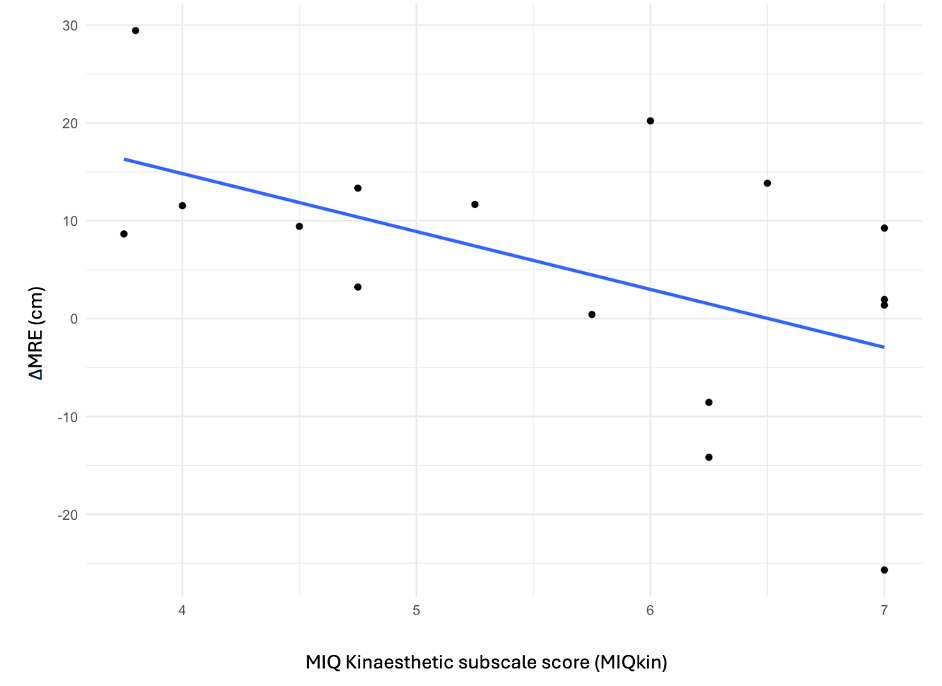

Supplementary Figure 1. *Change in MRE correlation with MIQ kinaesthetic subscale scores for the control group.*


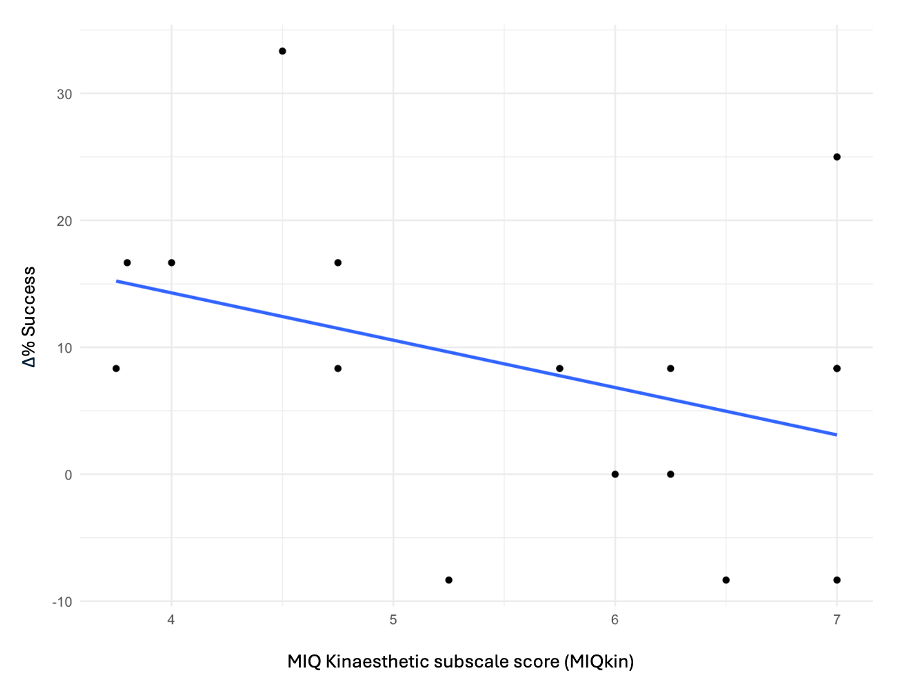


Supplementary Figure 2. *Change in %Success correlation with MIQ kinaesthetic subscale scores for the control group.*
